# Supplementary material for: High absorption shielding material of poly(phthalazinone etherketone)/multiwall carbon nanotube composite films with sandwich configurations
Source: Royal Society of Chemistry journal article supplement (doi:10.1039/c9ra02959a), 2019-01-01
Supplement: c9ra02959a1.pdf [file c9ra02959a1.pdf]

## Supporting Information

### **High Absorption Shielding Material of Poly(phthalazinone etherketone)/Multiwall Carbon Nanotube Composite Films with Sandwich Configurations**

Yunping Hu <sup>a</sup>, Ping Tang <sup>a</sup>, Longwei Li <sup>a</sup>, Junyu Yang <sup>b</sup>, Xigao Jian <sup>a</sup>, Yuezhen Bin

<sup>a\*</sup>

<sup>a</sup> Department of Polymer Science and Engineering, Faculty of Chemical, Environmental and Biological Science and Technology, Dalian University of Technology, No.2 Linggong Rd, Dalian, 116024, P. R. China

<sup>b</sup> Department of Chemical Engineering, University of Pittsburgh, 4200 Fifth Avenue, Pittsburgh, PA 15260, USA

\*Corresponding author.

Tel: +86- 411- 84986093.

E-mail address: [binyz@dlut.edu.cn](mailto:binyz@dlut.edu.cn) (0000-0002-3188-721X)

**Supplementary information:**

**Experimental Setup**

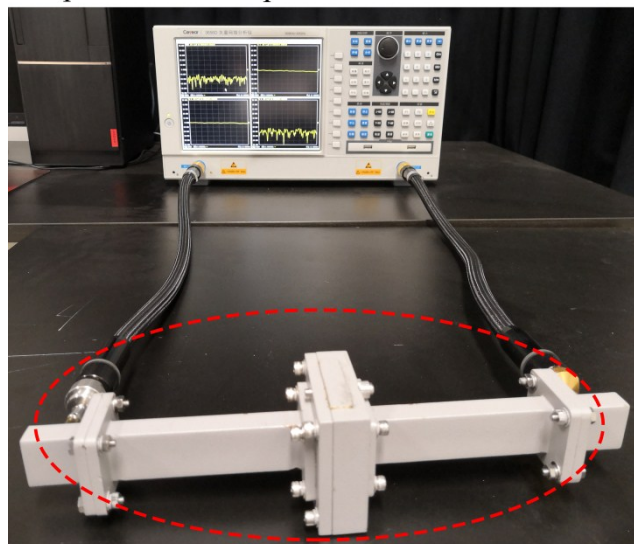

**Sample Holder**

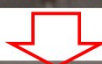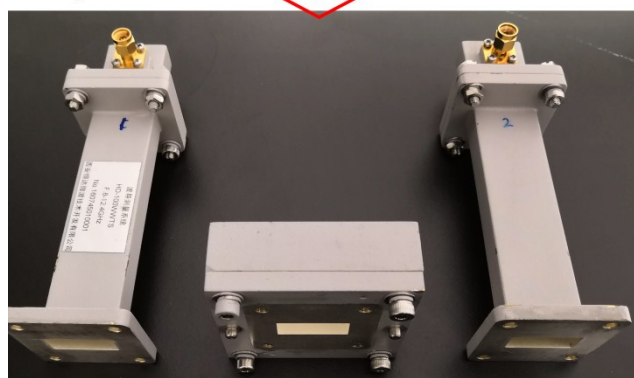

**Fig. S1** Digital pictures of experimental setup and the sample holder for testing of shielding property.

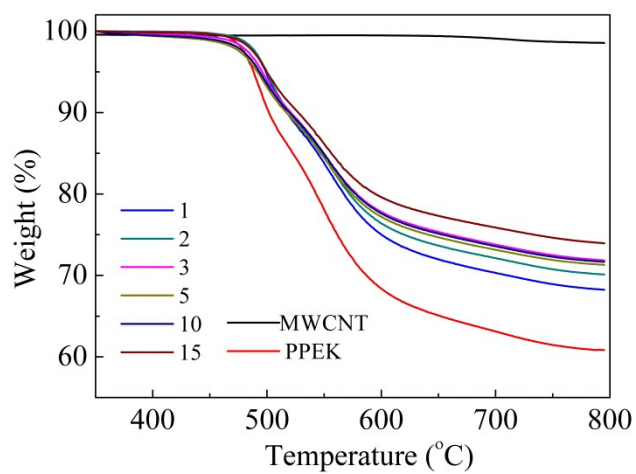

**Fig. S2** TG traces of MWCNT, PPEK, and PPEK/MWCNT composites with different mass ratio of MWCNT.

**Table S1** Results of TG traces for PEK and PEK/CNF composites:

| MWCNT loading (wt%) | $T_{max}^a$ (°C) | Char residue (%) at 800 °C |
|---------------------|------------------|----------------------------|
| 0 (PPEK)            | 496.6            | 60.83                      |
| 1                   | 496.5            | 68.24                      |
| 2                   | 498.7            | 70.11                      |
| 5                   | 498.7            | 71.85                      |
| 10                  | 502.3            | 71.3                       |
| 15                  | 502.8            | 71.67                      |
| 100% (MWCNT)        | 501.4            | 73.95                      |

<sup>a</sup> Temperature at which rate of mass loss is maximum

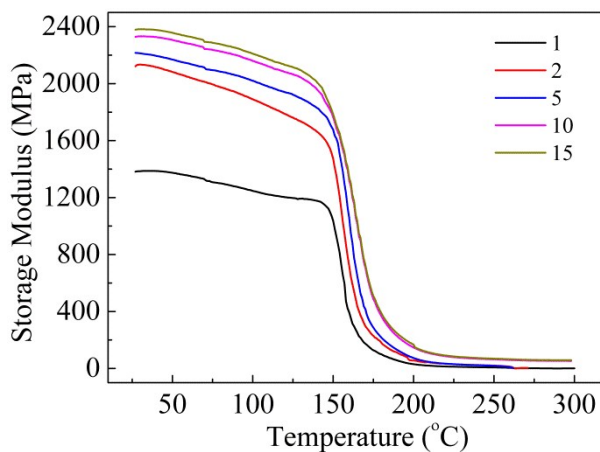

**Fig. S3** The storage modulus of PPEK/MWCNT composites with different mass ratio of MWCNT.

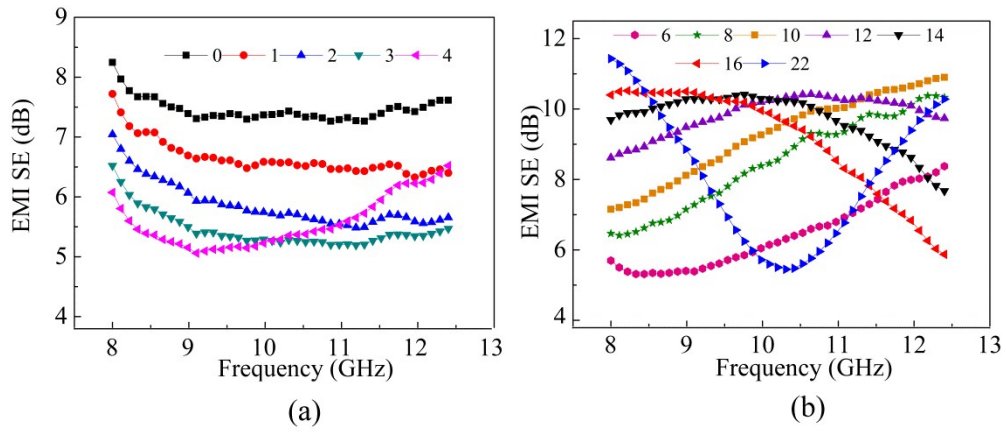

**Fig. S4** The SE of sample B with different  $d$  value in the frequency of 8.2–12.4 GHz, the annotations in the figure represent the  $d$  and the unit is millimeter.

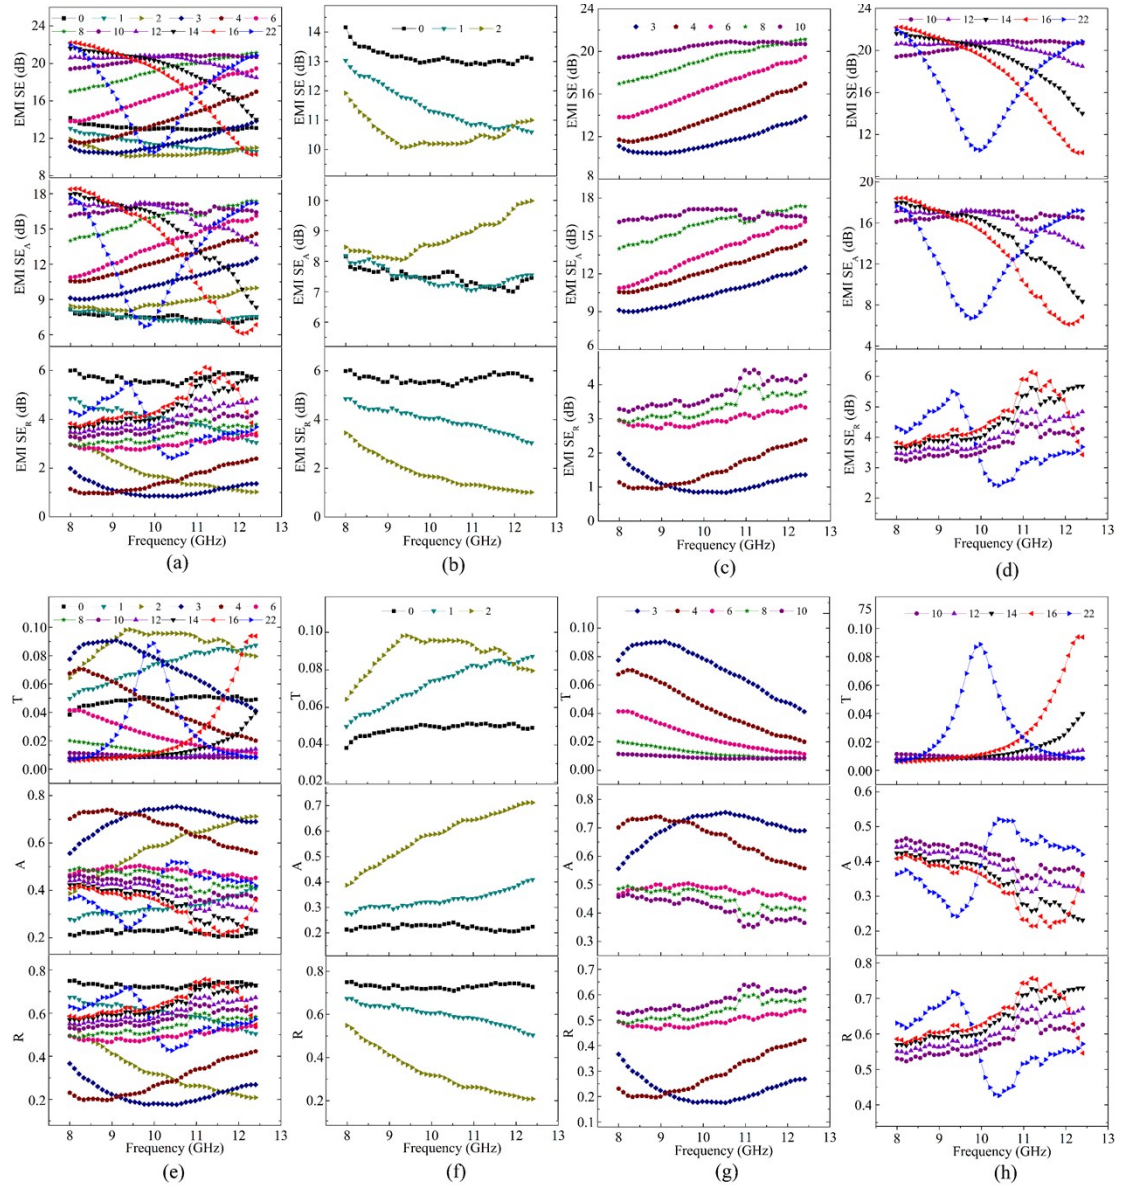

**Fig. S5** a-d) the SE, SE<sub>A</sub> and SE<sub>R</sub> of sample C in X-band with different  $d$  value: a) 0-22 mm, b) 0-2 mm, c) 3-10 mm and d) 10-22 mm; e-f) the T, A and R of sample C with different  $d$  value: e) 0-22mm, f) 0-2mm, g)3-10 mm and h) 10-22mm, the annotations in the figure represent the  $d$  and the unit is millimeter.

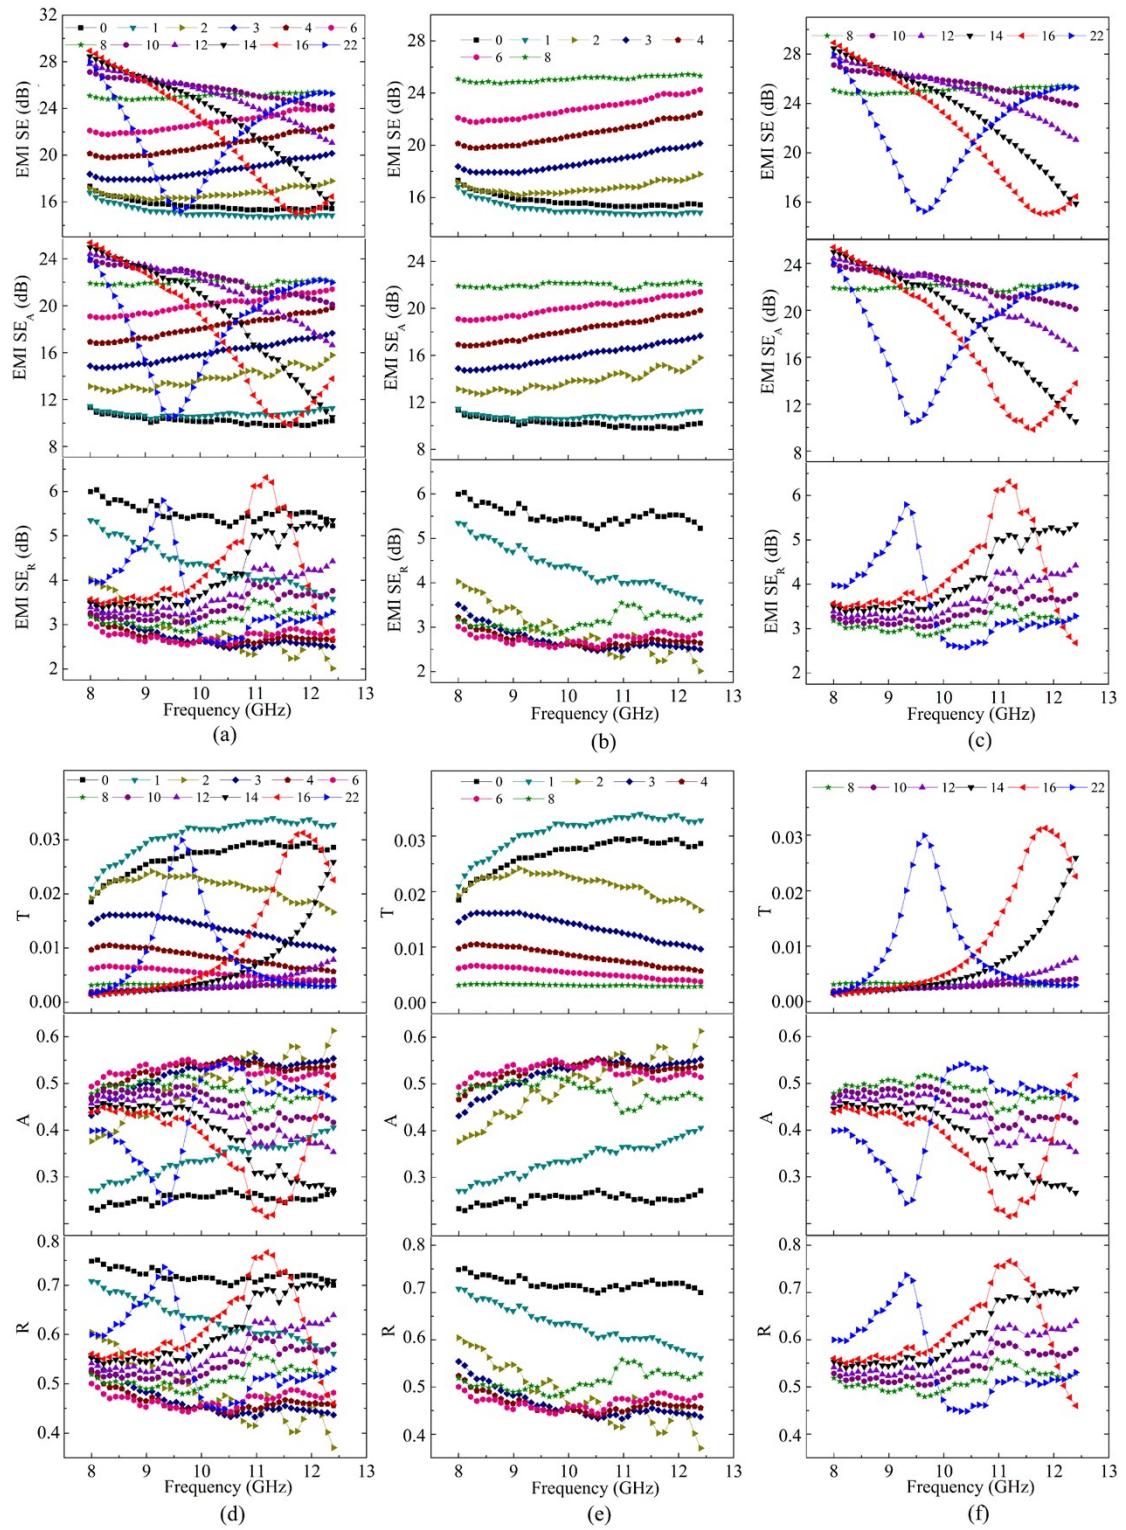

**Fig. S6** a-c) the  $SE$ ,  $SE_A$  and  $SE_R$  of sample D in X-band with different  $d$  value: a) 0-22 mm, b) 0-8 mm and c) 8-22 mm; d-f) the  $T$ ,  $A$  and  $R$  of sample D with different  $d$  value: e) 0-22mm, f) 0-8mm and g) 8-22 mm, the annotations in the figure represent the  $d$  and the unit is millimeter.

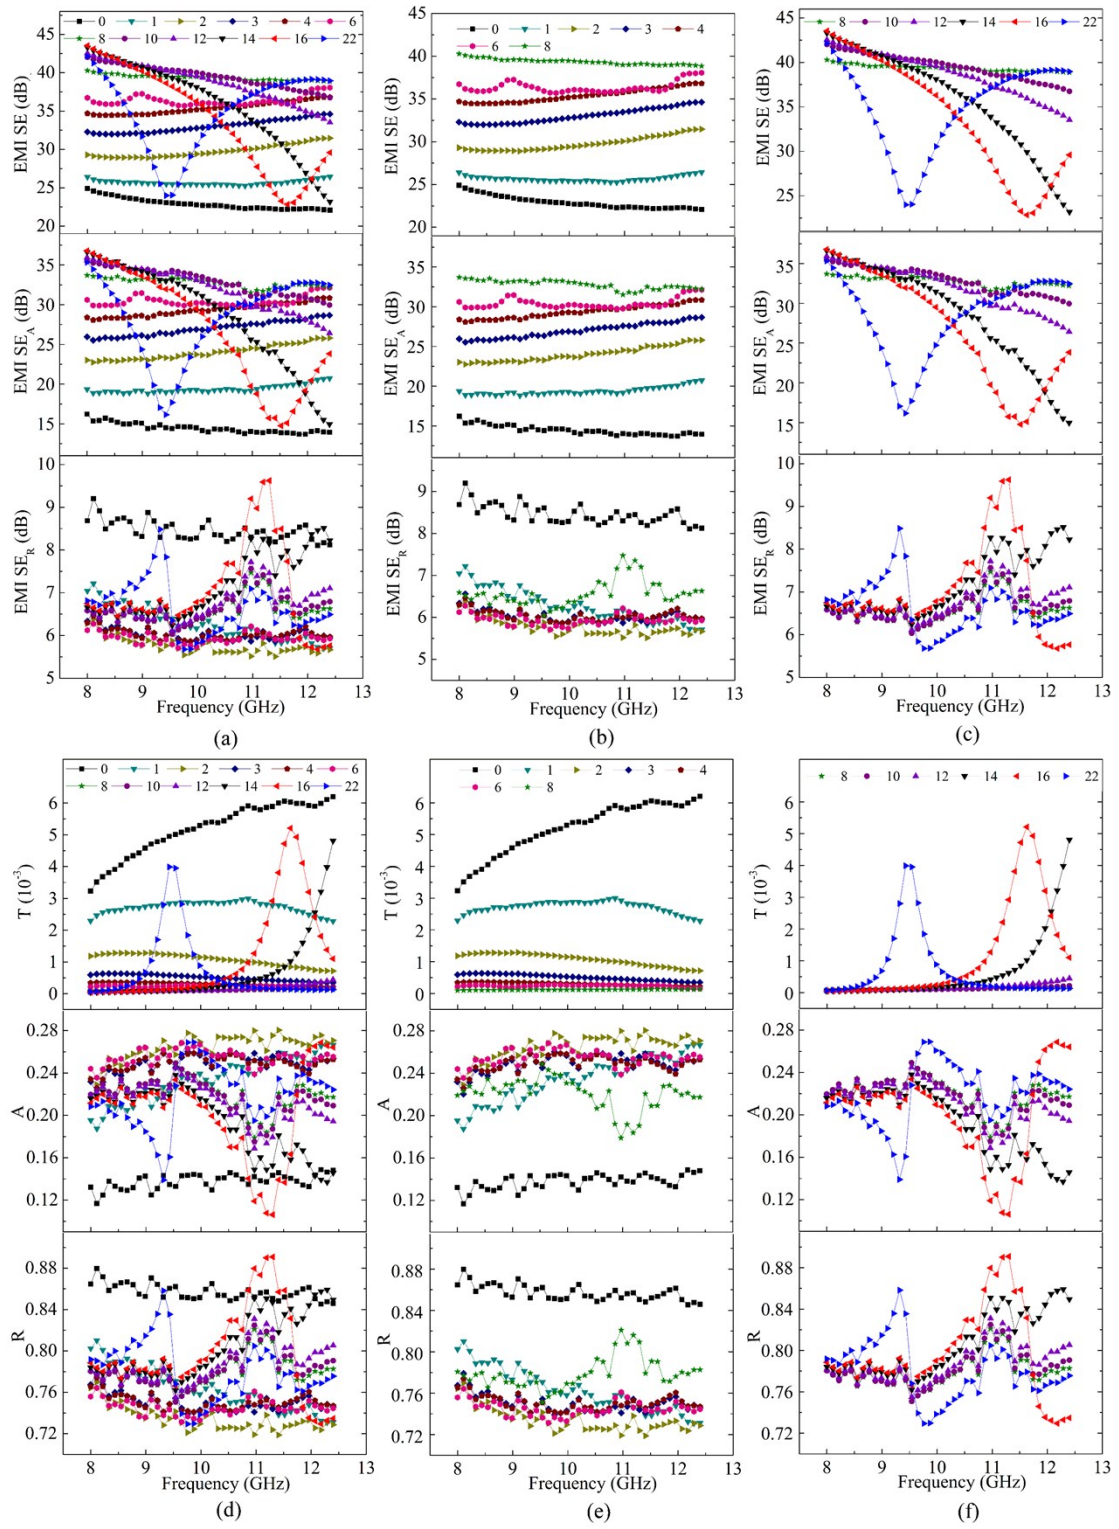

**Fig. S7** a-c) the SE,  $SE_A$  and  $SE_R$  of sample E in X-band with different  $d$  value: a) 0-22 mm, b) 0-8 mm and c) 8-22 mm; d-f) the T, A and R of sample E with different  $d$  value: e) 0-22mm, f) 0-8mm and g) 8-22 mm, the annotations in the figure represent the  $d$  and the unit is millimeter.

**Table S2** The position of resonance peak of samples with sandwich structure

| $d$<br>[ $\lambda$ ] | Frequency [GHz] |        |        |        |        |
|----------------------|-----------------|--------|--------|--------|--------|
|                      | A               | B      | C      | D      | E      |
| <b>0.56</b>          | -               | >12.40 | >12.40 | >12.40 | >12.40 |
| <b>0.64</b>          | >12.40          | >12.40 | 12.39  | 11.88  | 11.62  |
| <b>0.88</b>          | 10.45           | 10.32  | 9.96   | 9.65   | 9.46   |

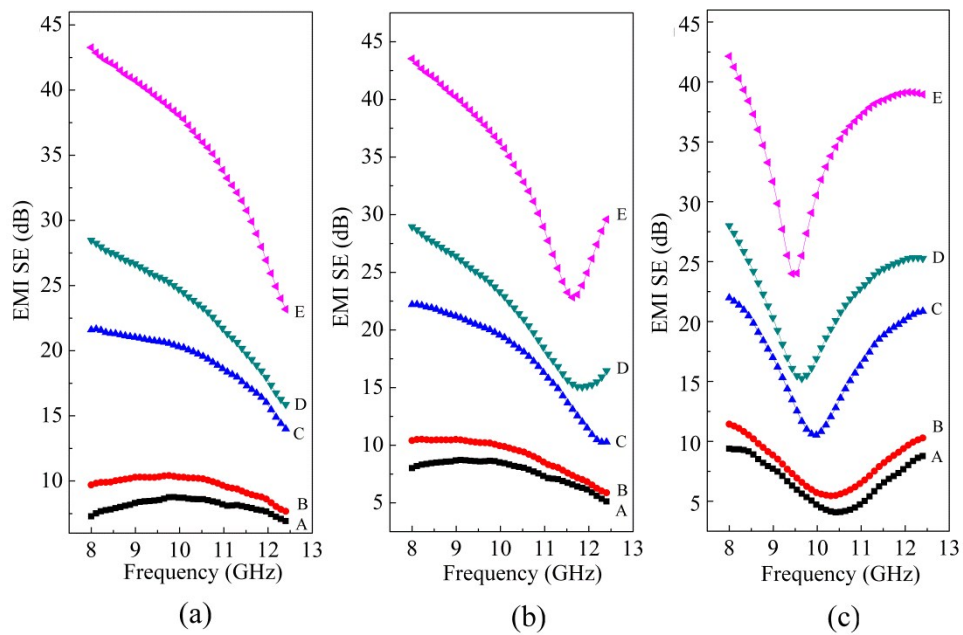

**Fig. S8** Dependence of EMI SE on frequency of sandwiched samples at specific  $d$  values: a)  $0.56\lambda$ , i.e., 14mm, b)

$0.64\lambda$ , i.e., 16mm and c)  $0.88\lambda$ , i.e., 22mm.



**Table S3** List of sandwiched and triple-layered sample.

| Sample | Number of Shielding Layer | $d$ (mm) | $d$ ( $\lambda$ ) |
|--------|---------------------------|----------|-------------------|
| E      | 2                         | 8        | 0.32              |
| F      | 3                         | 11,11    | 0.44, 0.44        |
| G      | 3                         | 0,0      | 0, 0              |

**Notes:**

EMI — electromagnetic interference

SE — shielding effectiveness

SE<sub>A</sub> — absorption loss

SE<sub>R</sub> — reflection loss

T — transmission coefficient

A — absorption coefficient

R — reflection coefficient

$d$  — the thickness of wave-transmitting layer

$\lambda$  —  $\lambda$  is 25mm, the minimum wavelength of the X-band

PPEK — Poly(phthalazinone etherketone)

MWCNT — multiwall carbon nanotube

WIPS — water induced phase separation

NMP — N-methyl pyrrolidinone
